# Supplementary material for: It Is Time to Address Airborne Transmission of Coronavirus Disease 2019 (COVID-19)
Source: Oxford University Press journal article supplement (doi:10.1093/cid/ciaa939), 2020-07-03
Supplement: ciaa939_suppl_supplementary_data.pdf [file ciaa939_suppl_supplementary_data.pdf]

# It is Time to Address Airborne Transmission of COVID-19

Understanding the transmission of respiratory infections indoors requires expertise in many distinctly different areas of science and engineering, including virology, aerosol physics, flow dynamics, exposure and epidemiology, medicine, and building engineering, to name the most significant. No one person has expertise in all these areas. However, collectively, the community of the signatories to the Comment understands the characteristics and mechanisms behind the generation of respiratory microdroplets, survival of viruses in the microdroplets, transport of the microdroplets and human exposure to them, and the airflow patterns that carry microdroplets in buildings. We have dedicated our careers working in this multidisciplinary field, and our statement stems from our collective expertise spanning the entire field.

The signatories listed on the first two pages contributed to the writing of this commentary, and all the signatories reviewed the document.

Professor Linsey C. Marr  
Civil and Environmental Engineering  
Virginia Tech, USA  
Email: [lmarr@vt.edu](mailto:lmarr@vt.edu)

Professor William Bahnfleth  
Department of Architectural Engineering  
The Pennsylvania State University, USA  
Email: [wbahnfleth@psu.edu](mailto:wbahnfleth@psu.edu)

Professor Jose-Luis Jimenez  
Department of Chemistry and Cooperative Institute  
for Research in Environmental Sciences (CIRES)  
University of Colorado at Boulder, USA  
Email: [jose.jimenez@colorado.edu](mailto:jose.jimenez@colorado.edu)

Professor Yuguo Li  
Department of Mechanical Engineering  
The University of Hong Kong, Hong Kong, China  
Email: [liy@hku.hk](mailto:liy@hku.hk)

William W. Nazaroff  
Daniel Tellep Distinguished Professor Emeritus  
Civil and Environmental Engineering Department  
University of California, Berkeley, USA  
Email: [nazaroff@ce.berkeley.edu](mailto:nazaroff@ce.berkeley.edu)

Professor Catherine Noakes  
School of Civil Engineering  
University of Leeds, United Kingdom  
Email: [C.J.Noakes@leeds.ac.uk](mailto:C.J.Noakes@leeds.ac.uk)

Dr Chandra Sekhar  
Individual Capacity, Singapore  
Email: [chandra.sc@gmail.com](mailto:chandra.sc@gmail.com)

Professor Julian Wei-Tze Tang  
Respiratory Sciences  
University Leicester, United Kingdom  
Email: [jwtang49@hotmail.com](mailto:jwtang49@hotmail.com)

Associate Professor Raymond Tellier  
Department of Medicine  
McGill University, Canada  
Email: [raymond.tellier@muhc.mcgill.ca](mailto:raymond.tellier@muhc.mcgill.ca)

Professor Philomena M. Bluysen  
Faculty of Architecture and the Built Environment  
Delft University of Technology, The Netherlands  
Email: [P.M.Bluysen@tudelft.nl](mailto:P.M.Bluysen@tudelft.nl)

Dr. Atze Boerstra  
REHVA Vice-President  
Federation of European Heating, Ventilation and Air  
Conditioning Associations  
The Hague, The Netherlands  
Email: [ab-bba@binnenmilieu.nl](mailto:ab-bba@binnenmilieu.nl)

Professor Giorgio Buonanno  
Department of Civil and Mechanical Engineering  
University of Cassino and Southern Lazio  
Cassino, Italy  
Email: [buonanno@unicas.it](mailto:buonanno@unicas.it)

Professor Junji Cao  
Institute of Earth Environment  
Chinese Academy of Sciences, Beijing, China  
Email: [cao@loess.llqg.ac.cn](mailto:cao@loess.llqg.ac.cn)

Professor Stephanie J. Dancer  
Department of Medical Microbiology, NHS  
Lanarkshire, School of Applied Sciences  
Edinburgh Napier University, United Kingdom  
Email: [Stephanie.Dancer@lanarkshire.scot.nhs.uk](mailto:Stephanie.Dancer@lanarkshire.scot.nhs.uk)

Dr. Francesco Franchimon  
Managing Director and Owner  
Vital Environments  
Franchimon ICM, The Netherlands  
Email: [francesco@franchimon-icm.nl](mailto:francesco@franchimon-icm.nl)

Dr. Charles Haworth  
Consultant Respiratory Physician, Cambridge  
Centre for Lung Infection, The Adult Cystic Fibrosis  
Centre, The Lung Defence Clinic, Royal Papworth  
Hospital, Cambridge, United Kingdom  
Email: [charles.haworth@nhs.net](mailto:charles.haworth@nhs.net)

Dr. Jaap Hogeling  
Managing Director, International Standards  
ISSO, Netherlands Building Research Institute, The  
Netherlands  
Email: [j.hogeling@isso.nl](mailto:j.hogeling@isso.nl)

Associate Professor Christina Isaxon  
Ergonomics and Aerosol Technology  
Lund University, Lund, Sweden  
Email: [christina.isaxon@design.lth.se](mailto:christina.isaxon@design.lth.se)

Professor Jarek Kurnitski  
Department of Civil Engineering and Architecture  
Tallinn University of Technology, Estonia  
Email: [jarek.kurnitski@taltech.ee](mailto:jarek.kurnitski@taltech.ee)

Assistant Professor Marcel Loomans  
Department of the Built Environment  
Eindhoven University of Technology (TU/e)  
The Netherlands  
Email: [m.g.l.c.loomans@tue.nl](mailto:m.g.l.c.loomans@tue.nl)

Professor Guy B. Marks  
Director, Centre for Air quality Research and  
evaluation (CAR), Faculty of Medicine  
University of New South Wales (UNSW), Sydney,  
Australia  
Email: [g.marks@unsw.edu.au](mailto:g.marks@unsw.edu.au)

Professor Livio Mazzarella  
AiCARR Vice President  
Department of Energy  
Politecnico di Milano, Italy  
Email: [livio.mazzarella@polimi.it](mailto:livio.mazzarella@polimi.it)

Professor Arsen Krikor Melikov  
International Centre for Indoor Environment and  
Energy, Department of Civil Engineering, Technical  
University of Denmark, Denmark  
Email: [akm@byg.dtu.dk](mailto:akm@byg.dtu.dk)

Professor Shelly Miller  
Mechanical Engineering Department  
University of Colorado Boulder, USA  
Email: [Shelly.Miller@colorado.edu](mailto:Shelly.Miller@colorado.edu)

Professor Emeritus Peter V. Nielsen  
The Faculty of Engineering and Science  
Department of Civil Engineering  
Aalborg University, Denmark  
Email: [pvn@civil.aau.dk](mailto:pvn@civil.aau.dk)

Professor Jordan Peccia  
Department of Chemical and Environmental  
Engineering, Yale University, USA  
Email: [jordan.peccia@yale.edu](mailto:jordan.peccia@yale.edu)

Professor Xavier Querol  
Department of Geosciences  
Institute of Environmental Assessment and Water  
Research, Spanish National Research Council  
Barcelona (IDAEA-CSIC), Spain  
Email: [xavier.querol@idaea.csic.es](mailto:xavier.querol@idaea.csic.es)

Professor Emeritus Olli Seppänen  
Department of Mechanical Engineering  
Aalto University Finland  
Email: [olli1944@gmail.com](mailto:olli1944@gmail.com)

Professor Shin-ichi Tanabe  
Department of Architecture  
Waseda University, Japan  
Email: [tanabe@waseda.jp](mailto:tanabe@waseda.jp)

Professor Kwok Wai Tham  
Department of Building  
National University of Singapore, Singapore  
Email: [bdqtkw@nus.edu.sg](mailto:bdqtkw@nus.edu.sg)

Associate Professor Pawel Wargocki  
International Centre for Indoor Environment and  
Energy, Department of Civil Engineering  
Technical University of Denmark  
Email: [paw@byg.dtu.dk](mailto:paw@byg.dtu.dk)

Associate Professor Aneta Wierzbicka  
Ergonomics and Aerosol Technology  
Lund University, Sweden  
Email: [Aneta.Wierzbicka@design.lth.se](mailto:Aneta.Wierzbicka@design.lth.se)

Boya Distinguished Professor Maosheng Yao  
College of Environmental Sciences and Engineering,  
Peking University, Beijing, China  
Email: [yao@pku.edu.cn](mailto:yao@pku.edu.cn)

## Co-Signing Scientists:

Professor Jonathan Abbatt  
Department of Chemistry  
University of Toronto, Canada  
Email: [jonathan.abbatt@utoronto.ca](mailto:jonathan.abbatt@utoronto.ca)

Dr. John Adgate  
Department of Environmental and Occupational  
Health, Colorado School of Public Health  
University of Colorado, USA  
Email: [john.adgate@cuanschutz.edu](mailto:john.adgate@cuanschutz.edu)

Professor Alireza Afshari  
Department of the Built Environment (BUILD)  
Aalborg University, Denmark  
Email: [aaf@build.aau.dk](mailto:aaf@build.aau.dk)

Professor Kang-Ho Ahn  
Department of Mechanical Engineering  
Hanyang University, Republic of Korea  
Email: [khahn@hanyang.ac.kr](mailto:khahn@hanyang.ac.kr)

Professor Francis Allard  
LaSIE (Engineering Sciences for Environmental  
Issues Laboratory)  
La Rochelle University, France  
Email: [francis.allard@univ-lr.fr](mailto:francis.allard@univ-lr.fr)

Professor Joseph Allen  
Healthy Buildings Program  
Harvard T.H. Chan School of Public Health, USA  
Email: [jgallen@hsph.harvard.edu](mailto:jgallen@hsph.harvard.edu)

Dr. Celia Alves  
Centre for Environmental and Marine Studies,  
University of Aveiro, Portugal  
Email: [celia.alves@ua.pt](mailto:celia.alves@ua.pt)

Professor Meinrat O. Andreae  
Max Planck Institute for Chemistry, Germany  
Email: [m.andreae@mpic.de](mailto:m.andreae@mpic.de)

Professor Isabella Annesi-Maesano  
Epidemiology of Allergic and Respiratory Diseases  
(EPAR) Department, IPLESP, INSERM and  
Sorbonne University, France  
Email: [isabella.annesi-maesano@inserm.fr](mailto:isabella.annesi-maesano@inserm.fr)

Professor Ahmet Arisoy  
Mechanical Engineering Department  
İstanbul Technical University, Turkey  
Email: [arisoyah@itu.edu.tr](mailto:arisoyah@itu.edu.tr)

Professor Andrew P. Ault  
Department of Chemistry  
University of Michigan, USA  
Email: [aulta@umich.edu](mailto:aulta@umich.edu)

Dr. Gwi-Nam Bae  
Center for Particulate Air Pollution and Health  
Korea Institute of Science and Technology,  
Republic of Korea  
Email: [gnae@kist.re.kr](mailto:gnae@kist.re.kr)

Dr. Gabriel Bekö  
International Centre for Indoor Environment and  
Energy, Department of Civil Engineering  
Technical University of Denmark, Denmark  
Email: [gab@byg.dtu.dk](mailto:gab@byg.dtu.dk)

Professor Scott C. Bell, Chief Executive  
Translational Research Institute  
Brisbane, Australia  
Email: [scott.bell@tri.edu.au](mailto:scott.bell@tri.edu.au)

Professor Allan Bertram  
Department of Chemistry  
University of British Columbia, Canada  
Email: [bertram@chem.ubc.ca](mailto:bertram@chem.ubc.ca)

Professor Mahmood Bhutta  
Department of ENT Surgery, Brighton & Sussex  
University Hospitals, United Kingdom  
Email: [m.bhutta@doctors.org.uk](mailto:m.bhutta@doctors.org.uk)

Dr. Seweryn Bialasiewicz  
Australian Centre for Ecogenomics  
The University of Queensland, Australia  
Email: [seweryn@uq.edu.au](mailto:seweryn@uq.edu.au)

Professor Merete Bilde  
Department of Chemistry  
Aarhus University, Denmark  
Email: [bilde@chem.au.dk](mailto:bilde@chem.au.dk)

Tami Bond, Scott Presidential Chair in Energy  
Environment and Health  
Department of Mechanical Engineering  
Colorado State University, USA  
Email: [Tami.Bond@colostate.edu](mailto:Tami.Bond@colostate.edu)

Professor Joseph Brain  
Department of Environmental Health  
Harvard University, USA  
Email: [brain@hsph.harvard.edu](mailto:brain@hsph.harvard.edu)

Professor Marianna Brodach  
Engineering Department, Moscow Architectural  
Institute (State Academy), Russia  
Email: [brodatch@abok.ru](mailto:brodatch@abok.ru)

Professor David M. Broday  
Civil & Environmental Engineering  
Technion Institute of Technology, Israel  
Email: [dbrodav@technion.ac.il](mailto:dbrodav@technion.ac.il)

Professor Guangyu Cao  
Department of Energy and Process Engineering  
Norwegian University of Science and Technology,  
Norway  
Email: [Guangyu.cao@ntnu.no](mailto:Guangyu.cao@ntnu.no)

Professor Christopher D. Cappa  
Department of Civil and Environmental Engineering  
University of California, Davis, USA  
Email: [cdcappa@ucdavis.edu](mailto:cdcappa@ucdavis.edu)

Professor Annmarie Carlton  
Department of Chemistry,  
University of California, Irvine, USA  
Email: [agcarlo@uci.edu](mailto:agcarlo@uci.edu)

Professor Paul K.S. Chan  
Department of Microbiology, Faculty of Medicine  
The Chinese University of Hong Kong,  
Hong Kong, China  
Email: [paulkschan@cuhk.edu.hk](mailto:paulkschan@cuhk.edu.hk)

Professor Christopher Chao  
Faculty of Engineering, The University of Hong  
Kong, Hong Kong, China  
Email: [cyhchao@hku.hk](mailto:cyhchao@hku.hk)

Associate Professor Kuan-Fu Chen  
Clinical Informatics and Medical Statistics Research  
Center and Department of Emergency Medicine,  
Chang Gung University and Chang Gung Memorial  
Hospital, Taiwan  
Email: [kfchen@mail.cgu.edu.tw](mailto:kfchen@mail.cgu.edu.tw)

Professor Qi Chen  
College of Environmental Sciences and Engineering  
Peking University, Beijing, China  
Email: [qichenpku@pku.edu.cn](mailto:qichenpku@pku.edu.cn)

Professor Qingyan Chen  
Mechanical Engineering, Purdue University, USA  
Email: [yanchen@purdue.edu](mailto:yanchen@purdue.edu)

Dr. David Cheong  
Individual Capacity, Singapore  
Email: [davidalice2005@yahoo.com.sg](mailto:davidalice2005@yahoo.com.sg)

Dr. Per Axcel Clausen  
New Technologies, National Research Centre for  
the Working Environment, Denmark  
Email: [pac@nrcwe.dk](mailto:pac@nrcwe.dk)

Professor Ross Crawford  
Orthopaedic Surgeon, The Prince Charles Hospital  
Medical Robotics, Queensland University of  
Technology, Brisbane, Australia  
Email: [r.crawford@qut.edu.au](mailto:r.crawford@qut.edu.au)

Professor Derek Clements-Croome  
Department of Built Environment  
Reading University, United Kingdom  
Email: [d.j.clements-croome@reading.ac.uk](mailto:d.j.clements-croome@reading.ac.uk)

Professor Geo Clausen  
Department of Civil Engineering  
Technical University of Denmark, Denmark  
Email: [gc@byg.dtu.dk](mailto:gc@byg.dtu.dk)

Dr. Ian Clifton  
Department of Respiratory Medicine, Leeds  
Teaching Hospitals NHS Trust, United Kingdom  
Email: [i.clifton@nhs.net](mailto:i.clifton@nhs.net)

Dean Richard L. Corsi  
Maseeh College of Engineering and Computer  
Science, Portland State University, Oregon, USA  
Email: [rcorsi@pdx.edu](mailto:rcorsi@pdx.edu)

Professor Benjamin J. Cowling  
School of Public Health, The University of Hong  
Kong, Hong Kong, China  
Email: [bcowling@hku.hk](mailto:bcowling@hku.hk)

Professor Francesca Romana d'Ambrosio  
Department of Industrial Engineering  
University of Salerno, Italy  
Email: [fdambrosio@unisa.it](mailto:fdambrosio@unisa.it)

Professor Ghassan Dbaibo  
Center for Infectious Diseases Research  
American University of Beirut, Lebanon  
Email: [gdbaibo@aub.edu.lb](mailto:gdbaibo@aub.edu.lb)

Professor Richard de Dear  
School of Architecture, Design and Planning  
The University of Sydney, Australia  
Email: [Richard.Dedear@sydney.edu.au](mailto:Richard.Dedear@sydney.edu.au)

Professor Gianluigi de Gennaro  
Department of Biology  
University of Bari Aldo Moro, Italy  
Email: [gianluigi.degennaro@uniba.it](mailto:gianluigi.degennaro@uniba.it)

Dr. Peter DeCarlo  
Environmental Health and Engineering  
Johns Hopkins University, USA  
Email: [pdecarl1@jhu.edu](mailto:pdecarl1@jhu.edu)

Professor Philip Demokritou  
Department of Environmental Health  
TH Chan School of Public Health  
Harvard University, USA  
Email: [pdemokri@hsph.harvard.edu](mailto:pdemokri@hsph.harvard.edu)

Dr. Hugo Destailats  
Indoor Environment Group  
Lawrence Berkeley National Laboratory, USA  
Email: [HDestailats@lbl.gov](mailto:HDestailats@lbl.gov)

Professor Joanna Domagala-Kulawik  
Department of Pneumonology and Allergy  
Medical University of Warsaw, Poland  
Email: [domagalakulawik@gmail.com](mailto:domagalakulawik@gmail.com)

Lord University Professor Neil M. Donahue  
Center for Atmospheric Particle Studies  
Carnegie Mellon University, USA  
Email: [nmd@andrew.cmu.edu](mailto:nmd@andrew.cmu.edu)

Professor Caroline Duchaine  
Biochemistry, Microbiology and Bio-Informatics  
Department, Université Laval, Canada  
Email: [caroline.duchaine@bcm.ulaval.ca](mailto:caroline.duchaine@bcm.ulaval.ca)

Professor Marzenna R. Dudzinska  
Department of Indoor and Outdoor Air Quality  
Lublin University of Technology, Poland  
Email: [m.dudzinska@pollub.pl](mailto:m.dudzinska@pollub.pl)

Professor Dominic E. Dwyer  
Director, New South Wales Health Pathology Public  
Health Pathology, NSWHP-ICPMR  
University of Sydney, Westmead, Australia  
Email: [dominic.dwyer@sydney.edu.au](mailto:dominic.dwyer@sydney.edu.au)

Professor Greg Evans P.Eng. FCAE, FAAAS  
Southern Ontario Centre for Atmospheric Aerosol  
Research  
University of Toronto, Canada  
Email: [greg.evans@utoronto.ca](mailto:greg.evans@utoronto.ca)

Associate Professor Delphine K. Farmer  
Department of Chemistry  
Colorado State University, USA  
Email: [delphine.farmer@colostate.edu](mailto:delphine.farmer@colostate.edu)

Kevin P. Fennelly, MD, MPH, ATSF  
Pulmonary Branch, Division of Intramural Research  
NHLBI / NIH, USA  
Email: [Kevin.Fennelly@nih.gov](mailto:Kevin.Fennelly@nih.gov)

Professor Richard Flagan  
Departments of Chemical Engineering and  
Environmental Science and Engineering  
California Institute of Technology, USA  
Email: [flagan@caltech.edu](mailto:flagan@caltech.edu)

Dr. Janine Fröhlich-Nowoisky  
Multiphase Chemistry  
Max Planck Institute for Chemistry, Germany  
Email: [j.frohlich@mpic.de](mailto:j.frohlich@mpic.de)

Professor Manuel Gameiro da Silva  
ADAI, LAETA, Department of Mechanical  
Engineering, EfS Initiative  
University of Coimbra, Portugal  
Email: [manuel.gameiro@dem.uc.pt](mailto:manuel.gameiro@dem.uc.pt)

Dr. Christian George  
IRCELYON, CNRS, France  
Email: [christian.george@ircelyon.univ-lyon1.fr](mailto:christian.george@ircelyon.univ-lyon1.fr)

Associate Professor Marianne Glasius  
Department of Chemistry  
Aarhus University, Denmark  
Email: [glasius@chem.au.dk](mailto:glasius@chem.au.dk)

Professor Allen H. Goldstein  
Department of Environmental Science, Policy, and  
Management  
University of California at Berkeley, USA  
Email: [ahg@berkeley.edu](mailto:ahg@berkeley.edu)

Professor João Gomes  
Chemical Engineering Department  
ISEL - Lisbon Polytechnic, Portugal  
Email: [jgomes@deq.isel.ipl.pt](mailto:jgomes@deq.isel.ipl.pt)

Dr. Michael Gormley  
Institute for Sustainable Building Design  
Heriot- Watt University, Edinburgh, United Kingdom  
Email: [m.gormley@hw.ac.uk](mailto:m.gormley@hw.ac.uk)

Professor Rafal Górný  
Department of Chemical, Aerosol and Biological  
Hazards, Central Institute for Labour Protection -  
National Research Institute, Poland  
Email: [ragor@ciop.pl](mailto:ragor@ciop.pl)

Professor Emeritus David Grimsrud  
Founding Editor, Indoor Air Journal  
University of Minnesota (Retired), USA  
Email: [grimsrud@earthlink.net](mailto:grimsrud@earthlink.net)

Professor Keith Grimwood  
School of Medicine  
Griffith University, Brisbane, Australia  
Email: [k.grimwood@griffith.edu.au](mailto:k.grimwood@griffith.edu.au)

Professor Charles N. Haas  
Civil, Architectural & Environmental Engineering  
Drexel University, USA  
Email: [haas@drexel.edu](mailto:haas@drexel.edu)

Professor Fariborz Haghighat  
Building, Civil and Environmental Engineering  
Concordia University, Canada  
Email: [Fariborz.Haghighat@concordia.ca](mailto:Fariborz.Haghighat@concordia.ca)

Professor Michael Hannigan  
Department of Mechanical Engineering  
University of Colorado, USA  
Email: [hannigan@colorado.edu](mailto:hannigan@colorado.edu)

Professor Roy Harrison  
School of Geography, Earth & Environmental  
Sciences,  
University of Birmingham, United Kingdom  
Email: [r.m.harrison@bham.ac.uk](mailto:r.m.harrison@bham.ac.uk)

Professor Ulla Haverinen-Shaughnessy, D. Sc.  
Civil Engineering; Indoor Air Program  
The University of Oulu; The University of Tulsa  
Finland & USA  
Email: [ulla.haverinen-shaughnessy@oulu.fi](mailto:ulla.haverinen-shaughnessy@oulu.fi)

Professor Philippa Howden-Chapman  
Department of Public Health  
University of Otago, Wellington, New Zealand  
Email: [philippa.howden-chapman@otago.ac.nz](mailto:philippa.howden-chapman@otago.ac.nz)

Professor Per Heiselberg  
Department of the Built Environment  
Aalborg University, Denmark  
Email: [pkh@build.aau.dk](mailto:pkh@build.aau.dk)

Professor Daven K. Henze  
Department of Mechanical Engineering  
University of Colorado Boulder, USA  
Email: [daven.henze@colorado.edu](mailto:daven.henze@colorado.edu)

Dr. Jean-Michel Heraud  
Virology Unit,  
Institut Pasteur de Madagascar, Madagascar  
Email: [jmheraud@pasteur.mg](mailto:jmheraud@pasteur.mg)

Professor Hartmut Herrmann  
Atmospheric Chemistry Department (ACD)  
Leibniz-Institute for Tropospheric Research  
(TROPOS), Germany  
Email: [herrmann@tropos.de](mailto:herrmann@tropos.de)

Professor Philip K. Hopke  
Public Health Sciences, University of Rochester  
School of Medicine and Dentistry, USA  
Email: [philip\\_hopke@URMC.rochester.edu](mailto:philip_hopke@URMC.rochester.edu)

Ray Horstman,  
Beoing (Retired), USA  
Email: [randshors@gmail.com](mailto:randshors@gmail.com)

Professor Wei Huang  
Department of Occupational and Environmental  
Health, Peking University, Beijing, China  
Email: [whuang@pku.edu.cn](mailto:whuang@pku.edu.cn)

Professor J. Alex Huffman  
Department of Chemistry and Biochemistry  
University of Denver, USA  
Email: [alex.huffman@du.edu](mailto:alex.huffman@du.edu)

Professor David S. Hui  
Department of Medicine & Therapeutics, The  
Chinese University of Hong Kong,  
Hong Kong, China  
Email: [dschui@cuhk.edu.hk](mailto:dschui@cuhk.edu.hk)

Professor Tareq Hussein  
Department of Physics  
University of Jordan, Jordan  
Email: [t.hussein@ju.edu.jo](mailto:t.hussein@ju.edu.jo)

Dr. Gabriel Isaacman-VanWertz  
Civil and Environmental Engineering  
Virginia Tech, USA  
Email: [ivw@vt.edu](mailto:ivw@vt.edu)

Professor Jouni J.K. Jaakkola  
Center for Environmental and Respiratory Health  
Research, University of Oulu, Finland  
Email: [jouni.jaakkola@oulu.fi](mailto:jouni.jaakkola@oulu.fi)

Professor Matti Jantunen  
National Institute for Health and Welfare, Finland  
Email: [matti.jantunen@janding.fi](mailto:matti.jantunen@janding.fi)

Associate Professor Lance Jennings  
Pathology and Biomedical Science  
University of Otago, Christchurch, New Zealand  
Email: [lance.jennings@cdbh.health.nz](mailto:lance.jennings@cdbh.health.nz)

Professor Dennis Johansson  
Building Services, Lund University, Sweden  
Email: [dennis.johansson@hvac.lth.se](mailto:dennis.johansson@hvac.lth.se)

Dr. Jan Kaczmarczyk  
Department of Heating, Ventilation and Dust  
Removal Technology  
Silesian University of Technology, Poland  
Email: [jan.kaczmarczyk@polsl.pl](mailto:jan.kaczmarczyk@polsl.pl)

Professor George Kallos  
Department of Physics  
National & Kapodistrian University of Athens,  
Greece  
Email: [kallos@mg.uoa.gr](mailto:kallos@mg.uoa.gr)

Professor David Katoshevski  
Environmental Engineering  
Ben-Gurion University of the Negev, Israel  
Email: [davidk@bgu.ac.il](mailto:davidk@bgu.ac.il)

Professor Frank Kelly  
School of Public Health  
Imperial College London, United Kingdom  
Email: [fkelly@imperial.ac.uk](mailto:fkelly@imperial.ac.uk)

Associate Professor Søren Kjærsgaard  
Department of Public Health  
Aarhus University, Denmark  
Email: [sk@ph.au.dk](mailto:sk@ph.au.dk)

Associate Professor Luke D. Knibbs  
School of Public Health  
The University of Queensland, Brisbane, Australia  
Email: [l.knibbs@uq.edu.au](mailto:l.knibbs@uq.edu.au)

Dr. Henrik N. Knudsen  
Department of the Built Environment (BUILD)  
Aalborg University, Denmark  
Email: [hnk@sbi.aau.dk](mailto:hnk@sbi.aau.dk)

Professor GwangPyo Ko  
Graduate School of Public Health  
Seoul National University, Republic of Korea  
Email: [gko@snu.ac.kr](mailto:gko@snu.ac.kr)

Associate Professor Evelyn S.C. Koay  
Yong Loo Lin School of Medicine, Department of  
Pathology  
National University of Singapore, Singapore  
Email: [patkoaye@nus.edu.sg](mailto:patkoaye@nus.edu.sg)

Dr. Jen Kok  
Centre for Infectious Disease and Microbiology  
Laboratory Services  
NSW Health Pathology-Institute of Clinical  
Pathology and Medical Research, Australia  
Email: [jen.kok@health.nsw.gov.au](mailto:jen.kok@health.nsw.gov.au)

Professor Nino Kuenzli, MD  
Department of Epidemiology and Public Health and  
Department of Education and Training, Swiss  
Tropical and Public Health Institute, Switzerland  
Email: [nino.kuenzli@swisstph.ch](mailto:nino.kuenzli@swisstph.ch)

Professor Risto Kosonen  
Mechanical Engineering, Aalto University, Finland  
Email: [risto.kosonen@aalto.fi](mailto:risto.kosonen@aalto.fi)

Professor Markku Kulmala  
Institute for Atmospheric and Earth System  
Research (INAR) / Physics, Faculty of Science  
University of Helsinki, Finland  
Email: [markku.kulmala@helsinki.fi](mailto:markku.kulmala@helsinki.fi)

Adjunct Professor Kazukiyo Kumagai  
Graduate School of Engineering  
Tokyo University of Science, Japan  
Email: [kkumagai@rs.tus.ac.jp](mailto:kkumagai@rs.tus.ac.jp)

Professor Prashant Kumar  
Global Centre for Clean Air Research (GCARE)  
University of Surrey, United Kingdom  
Email: [p.kumar@surrey.ac.uk](mailto:p.kumar@surrey.ac.uk)

Dr. Kazumichi Kuroda  
School of Medicine, Nihon University, Japan  
Email: [kuroda.kazumichi@nihon-u.ac.jp](mailto:kuroda.kazumichi@nihon-u.ac.jp)

Professor Kiyoungh Lee  
Department of Environmental Health Sciences  
Seoul National University, Republic of Korea  
Email: [cleanair@snu.ac.kr](mailto:cleanair@snu.ac.kr)

Professor Nelson Lee [MBBS, MRCP, MD,  
FRCP(Edin), FRCP(Lond), FIDSA]  
Department of Medicine, Division of Infectious  
Diseases, University of Alberta, Canada  
Email: [laishunn@ualberta.ca](mailto:laishunn@ualberta.ca)

Dr. Barry Lefer  
Individual Capacity, USA  
Email: [barry.lefer@nasa.gov](mailto:barry.lefer@nasa.gov)

Professor Vincent Lemort  
Thermodynamics Laboratory  
University of Liège, Belgium  
Email: [Vincent.Lemort@uliege.be](mailto:Vincent.Lemort@uliege.be)

Professor Xianting Li  
Department of Building Science  
Tsinghua University, Beijing, China  
Email: [xtlingli@tsinghua.edu.cn](mailto:xtlingli@tsinghua.edu.cn)

Professor Dusan Licina  
Civil and Environmental Engineering, EPFL – École  
Polytechnique Fédérale de Lausanne, Switzerland  
Email: [dusan.licina@epfl.ch](mailto:dusan.licina@epfl.ch)

Dr. Chao-Hsin Lin, PE  
Environmental Control Systems  
Boeing Commercial Airplanes, USA  
Email: [chao-hsin.lin@boeing.com](mailto:chao-hsin.lin@boeing.com)

Professor Junjie Liu  
School of Environmental Science and Engineering  
Tianjin University, China  
Email: [jjliu@tju.edu.cn](mailto:jjliu@tju.edu.cn)

Dr. Kam Lun E. Hon, MBBS, MD, FAAP, FCCM  
The Department of Paediatrics & The Hong Kong  
Institute of Integrative Medicine  
The Chinese University of Hong Kong,  
Hong Kong, China  
Email: [ehon@hotmail.com](mailto:ehon@hotmail.com)

Professor John C. Little  
Department of Civil and Environmental Engineering  
Virginia Tech, USA  
Email: [jcl@vt.edu](mailto:jcl@vt.edu)

Dr. Li Liu  
Department of Building Science  
Tsinghua University, Beijing, China  
Email: [liuli\\_archi@tsinghua.edu.cn](mailto:liuli_archi@tsinghua.edu.cn)

Dr. Janet M. Macher, ScD MPH  
School of Public Health, Alumna  
University of California, Berkeley, USA  
Email: [janmacher@berkeley.edu](mailto:janmacher@berkeley.edu)

Associate Professor Ebba Malmqvist  
Occupational and Environmental Medicine  
Lund University, Sweden  
Email: [ebba.malmqvist@med.lu.se](mailto:ebba.malmqvist@med.lu.se)

Dr. Corinne Mandin  
Department of Health and Comfort  
Scientific and Technical Center for Building, France  
Email: [corinne.mandin@cstb.fr](mailto:corinne.mandin@cstb.fr)

Professor Ivo Martinac  
Division of Sustainable Buildings, Building Services  
and Energy Systems  
KTH Royal Institute of Technology, Sweden  
Email: [im@kth.se](mailto:im@kth.se)

Professor Dainius Martuzevičius  
Faculty of Chemical Technology  
Kaunas University of Technology, Lithuania  
Email: [daimart@ktu.lt](mailto:daimart@ktu.lt)

Dr. Mark J. Mendell  
Indoor Environment Department  
Lawrence Berkeley National Laboratory, USA  
Email: [mmendell@pacbell.net](mailto:mmendell@pacbell.net)

Professor David Miller  
Department of Chemistry  
Carleton University, Ottawa, Canada  
Email: [david.miller@carleton.ca](mailto:david.miller@carleton.ca)

Assistant Professor Claudia Mohr  
Department of Environmental Science  
Stockholm University, Sweden  
Email: [claudia.mohr@aces.su.se](mailto:claudia.mohr@aces.su.se)

Dr. Luisa T. Molina  
Department of Earth, Atmospheric and Planetary  
Sciences  
Massachusetts Institute of Technology, USA  
Email: [lmolina@mit.edu](mailto:lmolina@mit.edu)

Professor Glenn Morrison  
Environmental Sciences and Engineering  
University of North Carolina, Chapel Hill, USA  
Email: [glenn.morrison@unc.edu](mailto:glenn.morrison@unc.edu)

Dr. Roya Mortazavi  
Atmospheric and Oceanic Sciences  
McGill University, Canada  
Email: [roya.mortazavi@mail.mcgill.ca](mailto:roya.mortazavi@mail.mcgill.ca)

Professor Edward Nardell  
Department of Global Health Equity, Brigham &  
Woman's Hospital, Harvard University School of  
Medicine and School of Public Health, USA  
Email: [enardell@bwh.harvard.edu](mailto:enardell@bwh.harvard.edu)

Professor Athanasios Nenes  
School of Architecture, Civil and Environmental  
Engineering, École Polytechnique Fédérale de  
Lausanne, Switzerland  
Email: [athanasios.nenes@epfl.ch](mailto:athanasios.nenes@epfl.ch)

Emeritus Adjunct Professor Mark Nicas  
School of Public Health, University of California,  
Berkeley, USA  
Email: [mnicas@berkeley.edu](mailto:mnicas@berkeley.edu)

Professor Zhi Ning  
Division of Environment and Sustainability  
The Hong Kong University of Science and  
Technology, Hong Kong, Hong Kong, China  
Email: [zhining@ust.hk](mailto:zhining@ust.hk)

Professor Jianlei Niu  
Fellow of ISIAQ, ASHRAE, and IBPSA  
Faculty of Construction and Environment  
The Hong Kong Polytechnic University, Hong Kong,  
Hong Kong, China  
Email: [jian-lei.niu@Polyu.edu.hk](mailto:jian-lei.niu@Polyu.edu.hk)

Dr. Hidekazu Nishimura  
Virus Reserch Center, Clinical Research Division  
Sendai Medical Center, National Hospital  
Organization, Japan  
Email: [hide-nishimura@mte.biglobe.ne.jp](mailto:hide-nishimura@mte.biglobe.ne.jp)

Professor Colin O'Dowd MAE MRIA  
Centre for Climate & Air Pollution Studies  
National University of Ireland Galway, United  
Kingdom  
Email: [colin.odowd@nuigalway.ie](mailto:colin.odowd@nuigalway.ie)

Professor Bjarne W. Olesen  
International Centre for Indoor Environment and  
Energy, Technical University of Denmark, Denmark  
Email: [bwo@byg.dtu.dk](mailto:bwo@byg.dtu.dk)

Dr. Paula J. Olsiewski  
Alfred P. Sloan Foundation, USA  
Email: [olsiewski@sloan.org](mailto:olsiewski@sloan.org)

Professor Spyros Pandis  
Chemical Engineering Department  
University of Patras, Greece  
Email: [spyros@chemeng.upatras.gr](mailto:spyros@chemeng.upatras.gr)

Professor Daniel Peckham  
Leeds Institute of Medical Research  
University of Leeds, United Kingdom  
Email: [d.g.pecham@leeds.ac.uk](mailto:d.g.pecham@leeds.ac.uk)



Professor Tuukka Petäjä  
Institute for Atmospheric and Earth System  
Research (INAR) / Physics  
Faculty of Science, University of Helsinki, Finland  
Email: [tuukka.petaja@helsinki.fi](mailto:tuukka.petaja@helsinki.fi)

Professor Zbigniew Popiolek  
Department of Heating Ventilation and Dust  
Removal Technology  
Silesian University of Technology in Gliwice  
(Politechnika Śląska), Poland  
Email: [zbigniew.popiolek@polsl.pl](mailto:zbigniew.popiolek@polsl.pl)

Professor Ulrich Pöschl  
Multiphase Chemistry Department  
Max Planck Institute for Chemistry, Germany  
Email: [u.poschl@mpic.de](mailto:u.poschl@mpic.de)

Dr. Wayne R. Ott  
Department of Civil and Environmental Engineering  
Stanford University, USA  
Email: [wott1@stanford.edu](mailto:wott1@stanford.edu)

Professor Kimberly Prather  
Distinguished Chair in Atmospheric Chemistry  
Scripps Institution of Oceanography  
University of California, San Diego, USA  
Email: [kprather@ucsd.edu](mailto:kprather@ucsd.edu)

Professor Andre S. H. Prevot  
Laboratory of Atmospheric Chemistry  
Paul Scherrer Institute, Switzerland  
Email: [andre.prevot@psi.ch](mailto:andre.prevot@psi.ch)

Professor Hua Qian  
School of Energy and Environment  
Southeast University, China  
Email: [qianh@seu.edu.cn](mailto:qianh@seu.edu.cn)

Dr. Shanna Ratnesar-Shumate  
Department of Pathology and Microbiology  
University of Nebraska Medical Center, USA  
Email: [sratnesar@gmail.com](mailto:sratnesar@gmail.com)

James L. Repace, MSc.  
President, Repace Associates, Inc. Secondhand  
Smoke Consultants, USA  
Email: [repace1@verizon.net](mailto:repace1@verizon.net)

Professor Tiina Reponen  
Department of Environmental and Public Health  
Sciences University of Cincinnati, USA  
Email: [Tiina.Reponen@uc.edu](mailto:Tiina.Reponen@uc.edu)

Professor Ilona Riipinen  
Department of Environmental Science  
Stockholm University, Sweden  
Email: [ilona.riipinen@aces.su.se](mailto:ilona.riipinen@aces.su.se)

Emeritus Professor Susan Roaf  
Institute for Sustainable Building Design, EGIS  
Heriot Watt University, Edinburgh, United Kingdom  
Email: [s.roaf@hw.ac.uk](mailto:s.roaf@hw.ac.uk)

Professor Allen L. Robinson  
Department of Mechanical Engineering  
Carnegie Mellon University, USA  
Email: [alr@andrew.cmu.edu](mailto:alr@andrew.cmu.edu)

Professor Yinon Rudich  
Department of Earth and Planetary Sciences  
Weizmann Institute, Israel  
Email: [yinon.rudich@weizmann.ac.il](mailto:yinon.rudich@weizmann.ac.il)

Professor Manuel Ruiz de Adana  
Department of Applied Thermodynamics  
University of Cordoba, Spain  
Email: [manuel.ruiz@uco.es](mailto:manuel.ruiz@uco.es)

Dr. Masayuki Saijo  
Department of Virology  
National Institute of Infectious Diseases, Japan  
Email: [msaijo@nih.go.jp](mailto:msaijo@nih.go.jp)

Professor Reiko Saito  
Division of International Health  
Graduate School of Medical and Dental Sciences  
Niigata University, Japan  
Email: [jasmine@med.niigata-u.ac.jp](mailto:jasmine@med.niigata-u.ac.jp)

Professor Paulo Saldiva  
Department of Pathology  
University of São Paulo, Brazil  
Email: [pepino@usp.br](mailto:pepino@usp.br)

Professor Tunga Salthammer  
Department of Material Analysis and Indoor  
Chemistry  
Fraunhofer WKI, Braunschweig, Germany  
Email: [tunga.salthammer@wki.fraunhofer.de](mailto:tunga.salthammer@wki.fraunhofer.de)

Professor Joshua L. Santarpia  
Department of Pathology and Microbiology  
University of Nebraska Medical Center, USA  
Email: [josh.santarpia@unmc.edu](mailto:josh.santarpia@unmc.edu)

Nohl Professor John H. Seinfeld  
Department of Chemical Engineering  
California Institute of Technology, USA  
Email: [seinfeld@caltech.edu](mailto:seinfeld@caltech.edu)

Distinguished Professor Emeritus Gary S. Settles  
Mechanical Engineering  
Pennsylvania State University, USA  
Email: [gss2@psu.edu](mailto:gss2@psu.edu)

Associate Professor Siegfried Schobesberger  
Department of Applied Physics  
University of Eastern Finland, Finland  
Email: [siegfried.schobesberger@uef.fi](mailto:siegfried.schobesberger@uef.fi)

Associate Professor Paul T. J. Scheepers  
Radboud Institute for Health Sciences  
Radboudumc, The Netherlands  
Email: [Paul.Scheepers@radboudumc.nl](mailto:Paul.Scheepers@radboudumc.nl)

Professor Max H. Sherman,  
Lawrence Berkeley National Laboratory (Retired),  
USA  
Email: [MHSherman@lbl.gov](mailto:MHSherman@lbl.gov)

Professor Alan Shihadeh  
Maroun Semaan Faculty of Engineering &  
Architecture, American University of Beirut, Lebanon  
Email: [as20@aub.edu.lb](mailto:as20@aub.edu.lb)

Professor Manabu Shiraiwa  
Department of Chemistry  
University of California, Irvine, USA  
Email: [m.shiraiwa@uci.edu](mailto:m.shiraiwa@uci.edu)

Professor Jeffrey Siegel  
Department of Civil & Mineral Engineering  
University of Toronto, Canada  
Email: [jeffrey.siegel@utoronto.ca](mailto:jeffrey.siegel@utoronto.ca)

Professor Torben Sigsgaard  
Department of Public Health  
Aarhus University, Denmark  
Email: [ts@ph.au.dk](mailto:ts@ph.au.dk)

Dr. Brett C. Singer  
Sustainable Energy and Environmental Systems  
Department  
Lawrence Berkeley National Laboratory, USA  
Email: [bcsinger@lbl.gov](mailto:bcsinger@lbl.gov)

Professor James N. Smith  
Department of Chemistry  
University of California, Irvine, USA  
Email: [jimsmith@uci.edu](mailto:jimsmith@uci.edu)

Professor Armin Sorooshian  
Department of Chemical and Environmental  
Engineering, University of Arizona, USA  
Email: [armin@email.arizona.edu](mailto:armin@email.arizona.edu)

Dr. Jerzy Sowa  
Faculty of Building Services, Hydro and  
Environmental Engineering  
Warsaw University of Technology, Poland  
Email: [jerzy.sowa@pw.edu.pl](mailto:jerzy.sowa@pw.edu.pl)

Professor Brent Stephens  
Department of Civil, Architectural, and  
Environmental Engineering,  
Illinois Institute of Technology, USA  
Email: [brent@iit.edu](mailto:brent@iit.edu)

Professor Huey-Jen Jenny Su  
Institute of Environmental Health Sciences  
National Cheng Kung University, Taiwan  
Email: [hjsu@mail.ncku.edu.tw](mailto:hjsu@mail.ncku.edu.tw)

Professor Jordi Sunyer  
Childhood and Environment, ISGlobal, Spain  
Email: [jordi.sunyer@isglobal.org](mailto:jordi.sunyer@isglobal.org)

Professor Jason D. Surratt  
Department of Environmental Sciences and  
Engineering, Gillings School of Global Public Health  
University of North Carolina at Chapel Hill, USA  
Email: [surratt@unc.edu](mailto:surratt@unc.edu)

Professor Kazuo Takahashi  
Department of Clinical Laboratory Medicine  
International University of Health and Welfare,  
Japan  
Email: [takahashikz@iuhw.ac.jp](mailto:takahashikz@iuhw.ac.jp)

Professor Nobuyuki Takegawa  
Department of Chemistry  
Tokyo Metropolitan University, Japan  
Email: [takegawa@tmu.ac.jp](mailto:takegawa@tmu.ac.jp)

Professor Jørn Toftum  
Department of Civil Engineering  
Technical University of Denmark, Denmark  
Email: [jt@byg.dtu.dk](mailto:jt@byg.dtu.dk)

Distinguished Professor Margaret A. Tolbert  
Department of Chemistry and CIRES  
University of Colorado, Boulder, USA  
Email: [tolbert@colorado.edu](mailto:tolbert@colorado.edu)

Associate Professor Euan Tovey  
Woolcock Institute of Medical Research  
University of Sydney, Australia  
Email: [euan.tovey@sydney.edu.au](mailto:euan.tovey@sydney.edu.au)

Professor Barbara J. Turpin  
Department of Environmental Sciences and  
Engineering, Gillings School of Global Public Health,  
University of North Carolina - Chapel Hill, USA  
Email: [bjturpin@email.unc.edu](mailto:bjturpin@email.unc.edu)

Professor Annele Virtanen  
Department of Applied Physics  
University of Eastern Finland, Finland  
Email: [annele.virtanen@uef.fi](mailto:annele.virtanen@uef.fi)

Professor John Volckens  
Department of Mechanical Engineering  
Colorado State University, USA  
Email: [john.volckens@colostate.edu](mailto:john.volckens@colostate.edu)

Professor Claire Wainwright  
Child Health Research Centre  
The University of Queensland, Brisbane, Australia  
Email: [claire.wainwright@health.qld.gov.au](mailto:claire.wainwright@health.qld.gov.au)

Dr. Lance A. Wallace  
US EPA (Retired), USA  
Email: [wallace73@gmail.com](mailto:wallace73@gmail.com)

Professor Boguang Wang  
Institute for Environmental and Climate Research  
Jinan University, Guangzhou, China  
Email: [tbongue@jnu.edu.cn](mailto:tbongue@jnu.edu.cn)

Professor Chia C. Wang  
Aerosol Science Research Center  
National Sun Yat-sen University, Taiwan  
Email: [chiawang@mail.nsysu.edu.tw](mailto:chiawang@mail.nsysu.edu.tw)

Professor Michael Waring  
Department of Civil, Architectural and Environmental  
Engineering, Drexel University, USA  
Email: [msw59@drexel.edu](mailto:msw59@drexel.edu)

Professor John Wenger  
School of Chemistry & Environmental Research  
Institute, University College Cork, Ireland, United  
Kingdom  
Email: [j.wenger@ucc.ie](mailto:j.wenger@ucc.ie)

Professor Charles J. Weschler  
Environmental & Occupational Health Sciences  
Institute  
Rutgers University, USA  
Email: [weschlch@rwjms.rutgers.edu](mailto:weschlch@rwjms.rutgers.edu)

Professor Brent Williams  
Department of Energy, Environmental, & Chemical  
Engineering  
Washington University in St. Louis, USA  
Email: [brentw@wustl.edu](mailto:brentw@wustl.edu)

Professor Mary E. Wilson  
Global Health  
San Francisco and Harvard Chan School of Public  
Health, University of California, USA  
Email: [mewilson@hsph.harvard.edu](mailto:mewilson@hsph.harvard.edu)

Professor Armin Wisthaler  
Department of Chemistry  
University of Oslo, Norway  
Email: [armin.wisthaler@kjemi.uio.no](mailto:armin.wisthaler@kjemi.uio.no)

Dr. Kazimierz Wojtas  
Faculty of Environmental and Power Engineering  
Cracow University of Technology, Poland  
Email: [kaz\\_wojtas@o2.pl](mailto:kaz_wojtas@o2.pl)

Dr. Douglas R. Worsnop  
Institute for Atmospheric and Earth System  
Research (INAR) / Physics, Aerodyne Research /  
University of Helsinki, USA / Finland  
Email: [worsnop@aerodyne.com](mailto:worsnop@aerodyne.com)

Professor Ying Xu  
Department of Building Science  
Tsinghua University, Beijing, China  
Email: [xu-ying@mail.tsinghua.edu.cn](mailto:xu-ying@mail.tsinghua.edu.cn)

Associate Professor Naomichi Yamamoto  
Environmental Health Sciences  
Seoul National University, Republic of Korea  
Email: [nyamamoto@snu.ac.kr](mailto:nyamamoto@snu.ac.kr)

Professor Xudong Yang  
Department of Building Science  
Tsinghua University, Beijing, China  
Email: [xyang@tsinghua.edu.cn](mailto:xyang@tsinghua.edu.cn)

Dr. Hui-Ling Yen  
School of Public Health  
The University of Hong Kong, Hong Kong, China  
Email: [hyen@hku.hk](mailto:hyen@hku.hk)

Professor Emeritus Hiroshi Yoshino  
Department of Architecture and Building Science  
Tohoku University, Japan  
Email: [yoshino@sabine.pln.archi.tohoku.ac.jp](mailto:yoshino@sabine.pln.archi.tohoku.ac.jp)

Dr. Hassan Zaraket  
Department of Experimental Pathology,  
Immunology, and Microbiology, Faculty of Medicine,  
American University of Beirut, Lebanon  
Email: [hz34@aub.edu.lb](mailto:hz34@aub.edu.lb)

Professor Zhiqiang (John) Zhai  
Department of Civil, Environmental and Architectural  
Engineering  
University of Colorado at Boulder, USA  
Email: [john.zhai@colorado.edu](mailto:john.zhai@colorado.edu)

Professor Junfeng (Jim) Zhang  
The Nicholas School of the Environment  
Duke University, USA  
Email: [junfeng.zhang@duke.edu](mailto:junfeng.zhang@duke.edu)

Professor Qi Zhang  
Department of Environmental Toxicology  
University of California, Davis, USA  
Email: [dkwzhang@ucdavis.edu](mailto:dkwzhang@ucdavis.edu)

Professor Jensen Zhang  
Department of Mechanical and Aerospace  
Engineering  
Syracuse University, USA  
Email: [jszhang@syr.edu](mailto:jszhang@syr.edu)

Professor Yinping Zhang  
Department of Building Science  
Tsinghua University, Beijing, China  
Email: [zhangyp@tsinghua.edu.cn](mailto:zhangyp@tsinghua.edu.cn)

Professor Bin Zhao  
Department of Building Science, School of  
Architecture, Tsinghua University, Beijing, China  
Email: [binzhao@tsinghua.edu.cn](mailto:binzhao@tsinghua.edu.cn)

Professor Tong Zhu  
College of Environmental Sciences and Engineering  
Peking University, Beijing, China  
Email: [tzhu@pku.edu.cn](mailto:tzhu@pku.edu.cn)
